# Supplementary material for: A Novel ADT Strategy Without Conventional Anti-Androgen Pretreatment: An Observational Study of Abiraterone Combined With Castration Therapy
Source: Research Square preprint supplement (doi:10.21203/rs.3.rs-8611150/v1), 2026-02-16
Supplement: Supplementary file 1 [file 4e891974d22d4a208164b960.xlsx]

## Sheet: Sheet2
Supplementary Table 1
	AGE RANGES	ISUP Grade at Biopsy	Clinical Stage at Diagnosis	Clinical Stage at Treatment	BMI	Testerone(ng/mL)								Day 0					Day 28
						base	Day 1	Day 2	Day 3	Day 7	Day 14	Day 21	Day 28	PSA(ng/mL)	ALT(U/L)	AST(U/L)	Albumin(g/L)	total bilirubin(μmol/l)	PSA(ng/mL)	ALT(U/L)	AST(U/L)	Albumin(g/L)	total bilirubin(μmol/l)
P01	70-79	3	T3aN1M0	locally-advanced	27.39	3.603	0.963	0.706	0.516	0.144	0	0	0	25.13	14	25	41.3	13.8	6.791	17	20	39	11.8
P02	70-79	3	T2N0M0	locally-advanced	26.4	4.15	5.126	0.34	0.13	0	0	0.032	0	17.772	33	29	37.5	8.9	1.7	98	30	41	14.8
P03	60-69	3	T2N0M0	locally-advanced	22.15	6.906	3.047	0.07	0.15	0.017	0.026	0	0.09	40.04	16	22	38.6	11.9	0.76	73	58	36.7	14.5
P04	70-79	3	T2N0M0	mHSPC	20.83	4.363	0.91	0.21	0	0.01	0	0	0	2.501	20	23	41.9	11.3	0.006	10	13	37	11.8
P05	60-69	3	T2N0M0	locally-advanced	20.47	9.006	3.509	0.22	0.032	0.006	0.22	0.032	0	28.88	16	24	40.3	8.1	0.98	36	29	36.1	5.4
P06	60-69	4	T3aN0M0	locally-advanced	25.39	9.302	3.301	0.7	0.02	0	0.02	0.029	0	14.2	15	24	40.8	11.1	0.103	43	29	40.5	7.8
P07	70-79	4	T3bN0M0	locally-advanced	20.32	4.8	4.86	0	0	0	0	0	0.06	17.167	24	31	40	9.3	0.632	24	26	38	13.7
P08	70-79	4	T3aN0M0	locally-advanced	25.95	6.45	3.89	0.27	0.42	0	0.02	0	0.055	13.239	15	18	34	6.3	1.04	23	18	35	4.6
P09	70-79	5	T2N0M0	mHSPC	26.64	2.97	1.71	0.04	0.058	0.049	0.026	0	0	11.7	14	20	41.7	23.1	0.13	14	31	35.6	14.5
P10	50-59	5	T4N1M0	locally-advanced	27.72	2.32	0.44	0.26	0.05	0.05	0	0	0	24.3	18	18	47	15.6	0.12	18	27	45	15.8
P11	60-69	5	T2N0M0	locally-advanced	23.56	4.19	0.4	0.38	0	0	0	0	0	27.394	13	13	42	8.7	0.037	27	17	29	12
P12	50-59	3	T3bN1M0	locally-advanced	18.44	4.2	1.26	0.81	0.29	0	0.032	0	0.026	33.738	41	31	44	8.3	6.922	100	43	45	12.7
P13	60-69	5	T4N1M0	locally-advanced	23.88	4.64	1.02	0.79	0	0	0	0	0	18.4	19	21	32	7	2.42	21	22	34	10.6
P14	70-79	5	T4N1M1b	mHSPC	22.03	3.56	0.89	0.32	0	0	0	0	0	491.855	25	18	32	10.3	5.04	20	21	33	11.4
P15	60-69	5	T4N1M0	locally-advanced	24.96	1.9	0.07	0.07	0	0	0	0	0	70.281	15	12	44	7.9	3.584	15	10	45	7.4
P16	70-79	5	T2N0M0	locally-advanced	24.22	5.97	3.96	0.09	0.09	0.09	0.09	0	0	4.94	24	24	46	18	0.49	25	23	45	19.1
P17	60-69	4	T2N0M0	locally-advanced	28.73	2.84	0.16	0.12	0.026	0.009	0	0	0	147.2	21	19	50	10.8	1.52	83	54	45.6	14.7
P18	40-49	5	T2N0M0	locally-advanced	27.78	1.161	0.752	0.492	0.037	0	0.037	0	0.069	29.84	13	21	47.7	9.9	2.69	18	20	42.6	9.9
P19	70-79	3	T3aN1M1b	mHSPC	27.66	2.1	0.31	0.13	0.29	0.54	0.38	0.46	0.35	347.975	16	43	40	12.6	6.126	30	14	38	9.4
P20	60-69	4	T3aN0M0	locally-advanced	23.32	3.71	0.41	0.24	0.32	0	0	0.32	0	36.5	19	14	43	10.8	2.645	47	23	48	17.3
P21	70-79	3	T3aN0M0	locally-advanced	29.59	3.4	0.57	0.51	0.16	0	0.42	0	0	49.585	26	20	48	16.1	0.854	23	23	48	13.1
P22	70-79	4	T3bN1M1a	mHSPC	29.07	1.5	0.29	0.3	0.31	0.46	0.44	0.79	0.27	262.7	13	15	34	5.8	75.171	24	20	42	9.4
P23	70-79	5	T4N1M1b	mHSPC	24.9	1.88	0.24	0.13	0	0	0	0	0	65.49	11	13	45	6.6	3.85	17	16	46	9
P24	60-69	3	T3bN1M1b	mHSPC	23.44	5.56	1.3	1.01	0.25	0.18	0	0	0	184.6	15	16	43	17.2	1.455	22	26	45	10.5
P25	60-69	2	T2N0M0	mHSPC	24.34	3.64	0.4	0.77	0.56	0.32	0.01	0	0.12	1.672	25	21	42	9.4	0.49	18	32	42	8.2
P26	60-69	5	T2N0M0	mHSPC	25.39	2.57	0.83	0.62	0.32	0	0	0	0	0.266	16	13	46	11.6	0.03	30	28	48	15
P27	70-79	5	T3bN1M1a	mHSPC	24.22	3.26	0.42	0.11	0	0	0	0	0	9.62	25	16	42	12.3	0.937	35	38	40	18.5
P28	60-69	5	T2N1M1c	mHSPC	19.88	3.44	1.07	0.41	0.27	0	0	0	0	1434.7	24	37	41	10.5	65.69	10	14	41	4.2
P29	70-79	5	T3aN0M0	locally-advanced	23.03	2.53	0.086	0.317	0.317	0.31	0.25	0.22	0	21.317	40	27	46	10.5	0.185	30	23	37	10.1
P30	60-69	5	T4N1M1c	mHSPC	21.77	3.22	3.02	0	0	0	0	0	0.1	62	14	25	39	8.5	0.278	16	22	40	9.4
P31	60-69	3	T3aN1M0	locally-advanced	24.11	0.93	0.67	0.63	0.35	0.36	0.23	0.19	0.36	0.001	21	22	42	11.3	0	25	22	49	6.8
P32	60-69	5	T4N1M1c	mHSPC	22.41	2.56	0.53	0.36	0.19	0	0	0	0	38.213	20	19	39	5.7	0.409	29	17	38	8.2
P33	60-69	5	T3aN1M0	locally-advanced	28.73	2.9	0.37	0	0	0.2	0	0.21	0.2	16.024	37	25	45	20.4	0.391	22	16	43	9.9
P34	60-69	5	T3aN0M0	locally-advanced	24.69	9	2.58	1.8	1.3	0.87	0.43	0.26	0.2	5.539	15	19	43	9.8	1.224	17	16	39	9.9
P35	70-79	5	T3bN0M0	locally-advanced	22.44	2.55	0.46	0	0.17	0	0	0	0	95	21	18	39	10.4	8.566	370	132	45	15
Baseline characteristics of all included patients. Abbreviations: ISUP, International Society of Urological Pathology; PSA, Prostate-specific antigen; mHSPC, Metastatic Hormone-Sensitive Prostate Cancer; BMI, Body mass index; ALT, Alanine aminotransferase; AST, Aspartate Aminotransferase.
